# Supplementary material for: Multiple-responsive supramolecular vesicle based on azobenzene–cyclodextrin host–guest interaction
Source: Royal Society of Chemistry journal article supplement (doi:10.1039/d0ra02123g), 2020-01-01
Supplement: d0ra02123g1.pdf [file d0ra02123g1.pdf]

# **Multiple-Responsive Supramolecular Vesicle Based on Azobenzene-Cyclodextrin Host-Guest Interaction**

Jiao Wang,\* Ting Wang, Xiaohui Liu, Yan Lu, Jingjing Geng

Department of Chemistry, Taiyuan Normal University, Jinzhong, 030619, China

**\*Corresponding author:** Jiao Wang

**Address:**

Department of Chemistry, Taiyuan Normal University, Jinzhong, 030619, China

**E-mail:** wangjiao@tynu.edu.cn

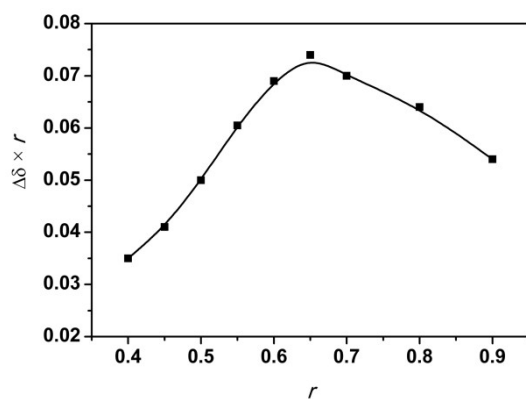

**Fig. S1**  $^1\text{H}$  NMR Job's plot corresponding to the chemical shift of H-5 of  $\beta$ -CD in  $\text{D}_2\text{O}$ .  $[\text{HPB}] + [\beta\text{-CD}] = 1.0 \text{ mM}$ .

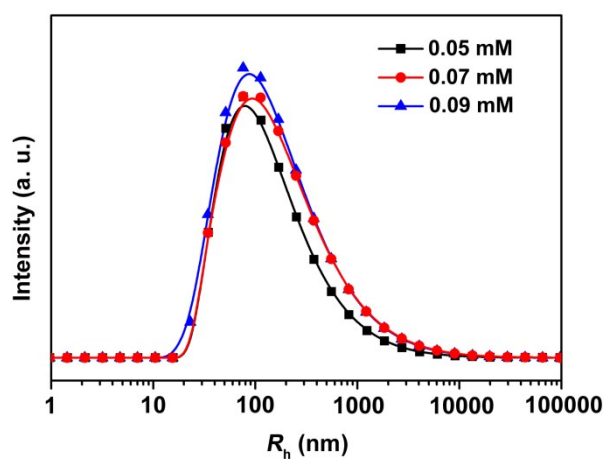

**Fig. S2** Hydrodynamic radius ( $R_h$ ) distribution determined by DLS for  $\text{HPB}@ \beta\text{-CD}$  aqueous solution at different concentration.

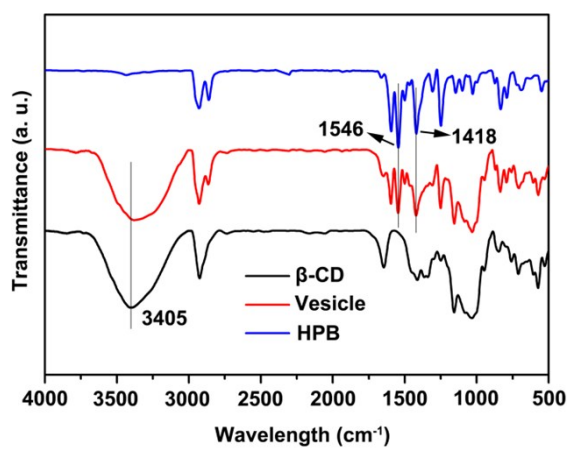

**Fig. S3** FTIR spectra of pure  $\beta$ -CD, HPB and dehydrated vesicles from  $0.1 \text{ mM HPB}@ \beta\text{-CD}$  sample.

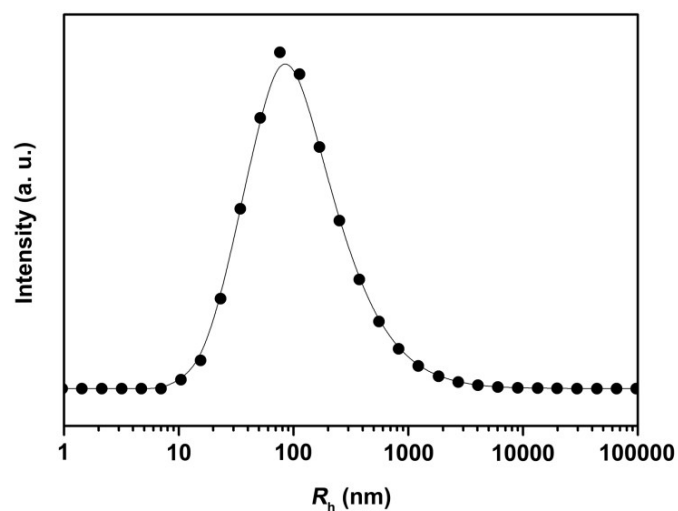

**Fig. S4** Hydrodynamic radius ( $R_h$ ) distribution determined by DLS for the reformed vesicles.

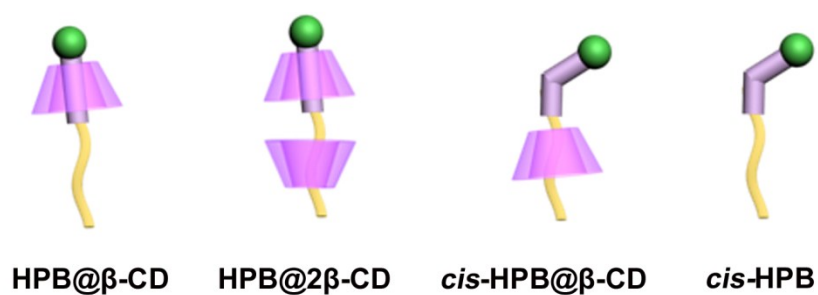

**Fig. S5** Molecular structure models of HPB@β-CD, HPB@2β-CD, *cis*-HPB@β-CD and *cis*-HPB.

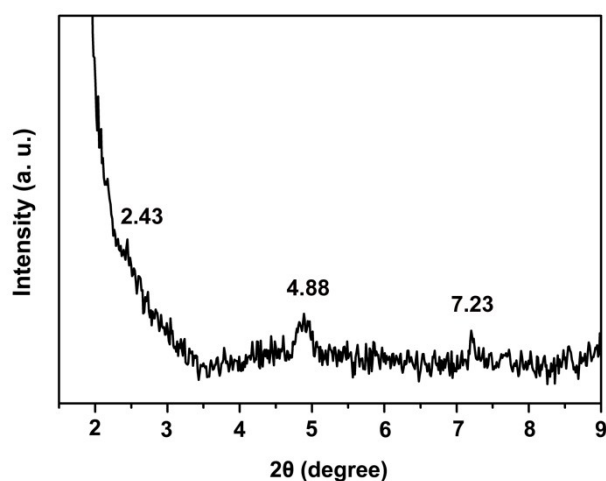

**Fig. S6** XRD pattern of microbelts from 0.1 mM HPB@β-CD sample at pH = 4.5. The sample was dried in vacuum at room temperature.

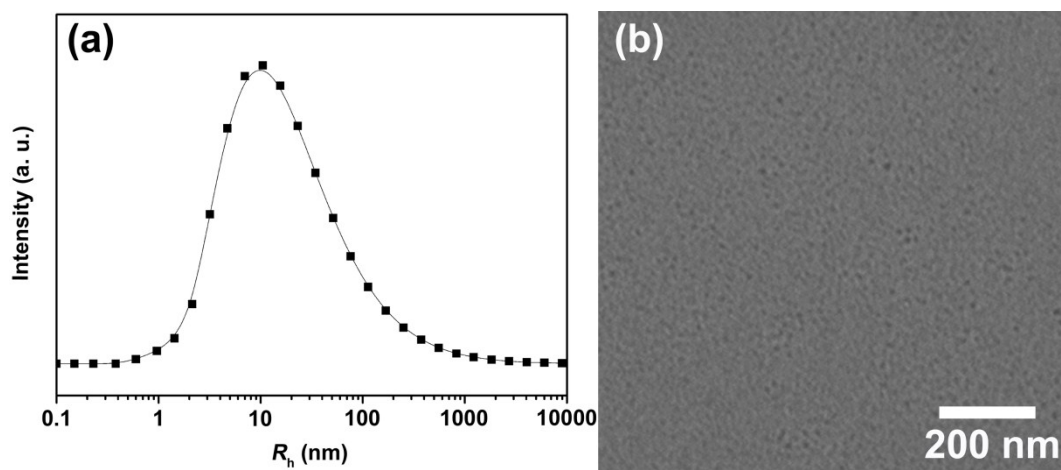

**Fig. S7** Hydrodynamic radius ( $R_h$ ) distribution (a) determined by DLS and TEM (b) for micelles from 0.1 mM HPB@ $\beta$ -CD aqueous solution after adding ADA at 25 °C.

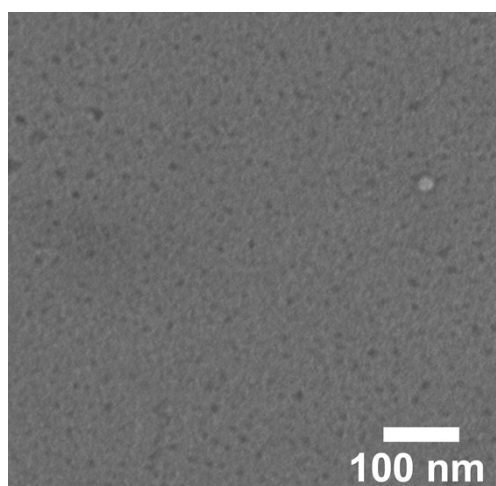

**Fig.S8** TEM (b) of micelles formed in 0.1 mM HPB@ $\beta$ -CD sample after adding  $\alpha$ -amylase.
